# Supplementary material
Source: ML conference proceedings conference paper supplement (https://openreview.net/forum?id=AP0iZoaRaS)
Supplement: supplementary_material [file attachment]

# INTERACTIVE PORTRAIT HARMONIZATION

**Anonymous authors**

Paper under double-blind review

## A MORE RESULTS

Figures 1 to 3 illustrate the predictions of the previous methods and our proposed method IPH on PortraitTest dataset. The prediction of our proposed method looks natural as the luminance, color and contrast of the harmonized foreground matches that of the reference region in the image.

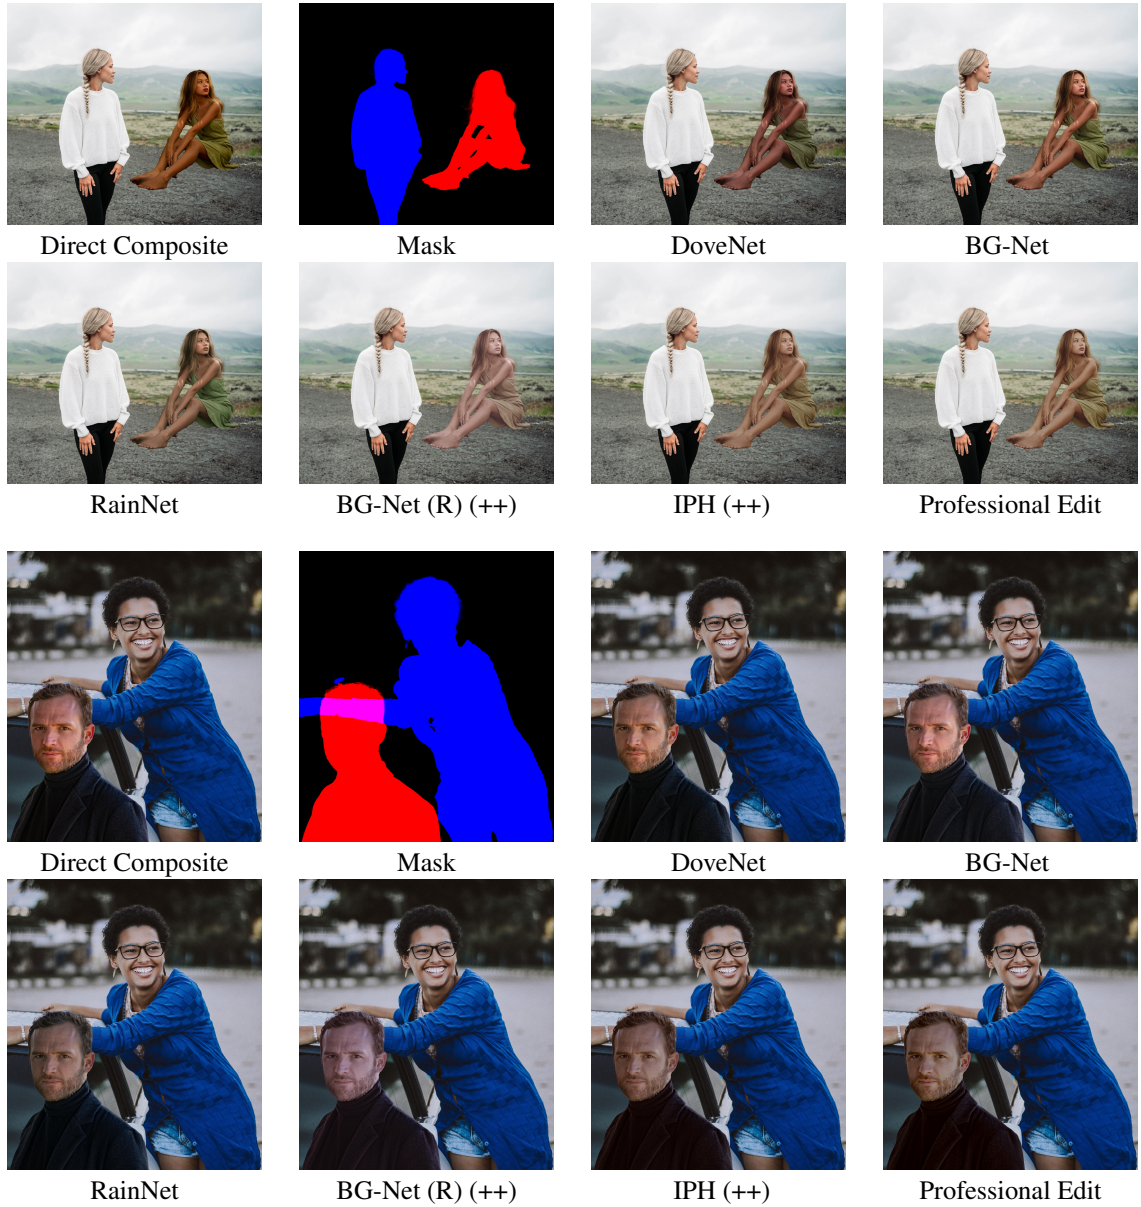

Figure 1: **Comparison with the State-of-the-art methods.** The red region in the mask corresponds to the foreground composite region while the blue region corresponds to the reference region. IPH is our proposed method and the professional edit is the ground truth.



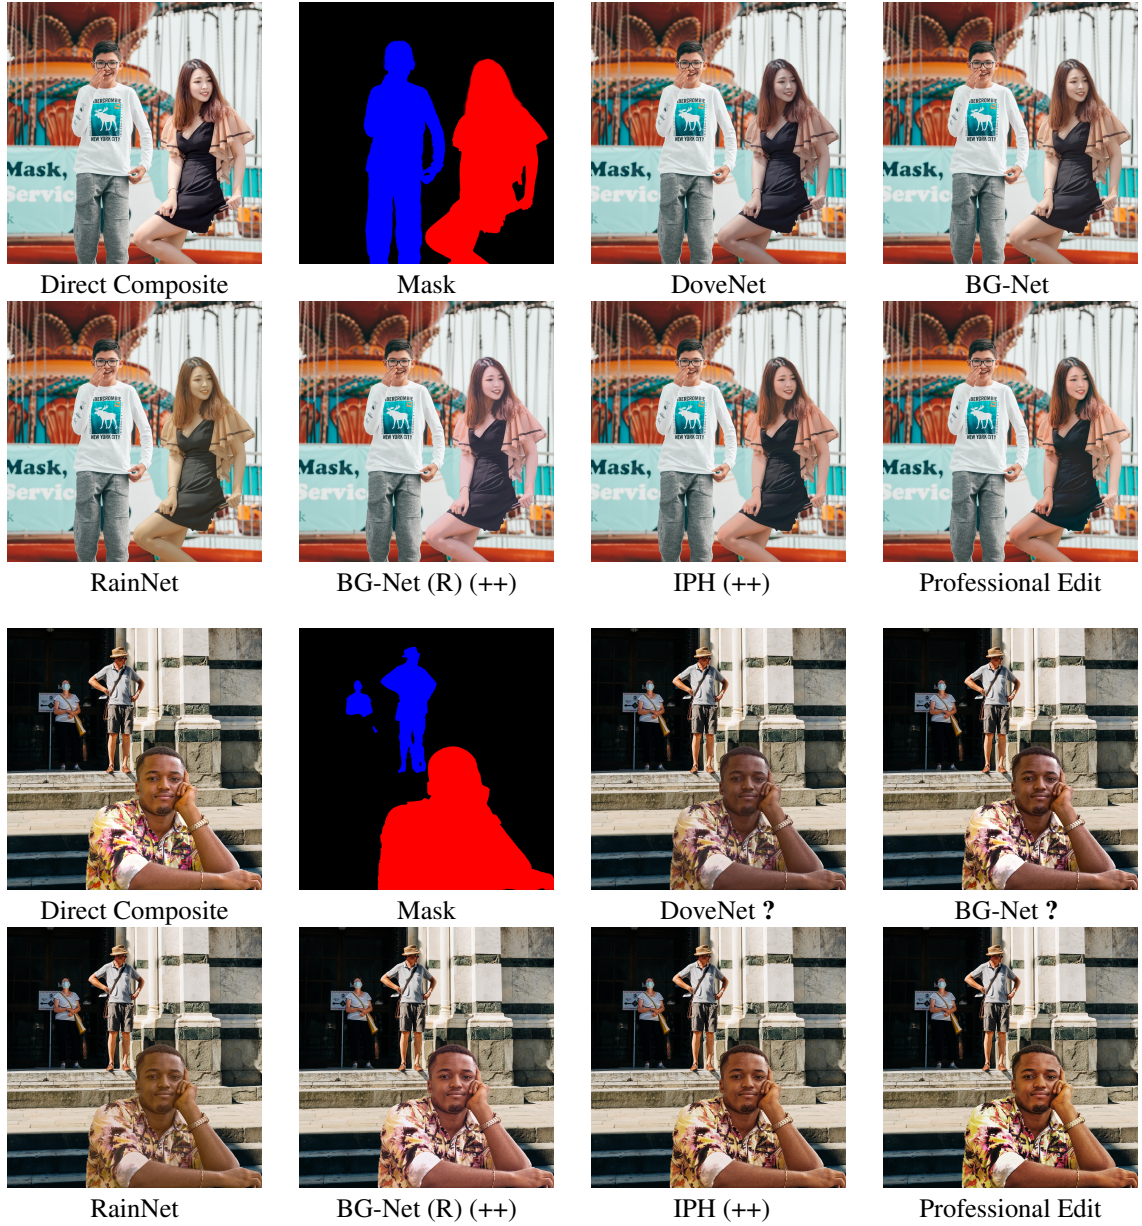

Figure 2: **Comparison with the State-of-the-art methods.** The red region in the mask corresponds to the foreground composite region while the blue region corresponds to the reference region. IPH is our proposed method and the professional edit is the ground truth.

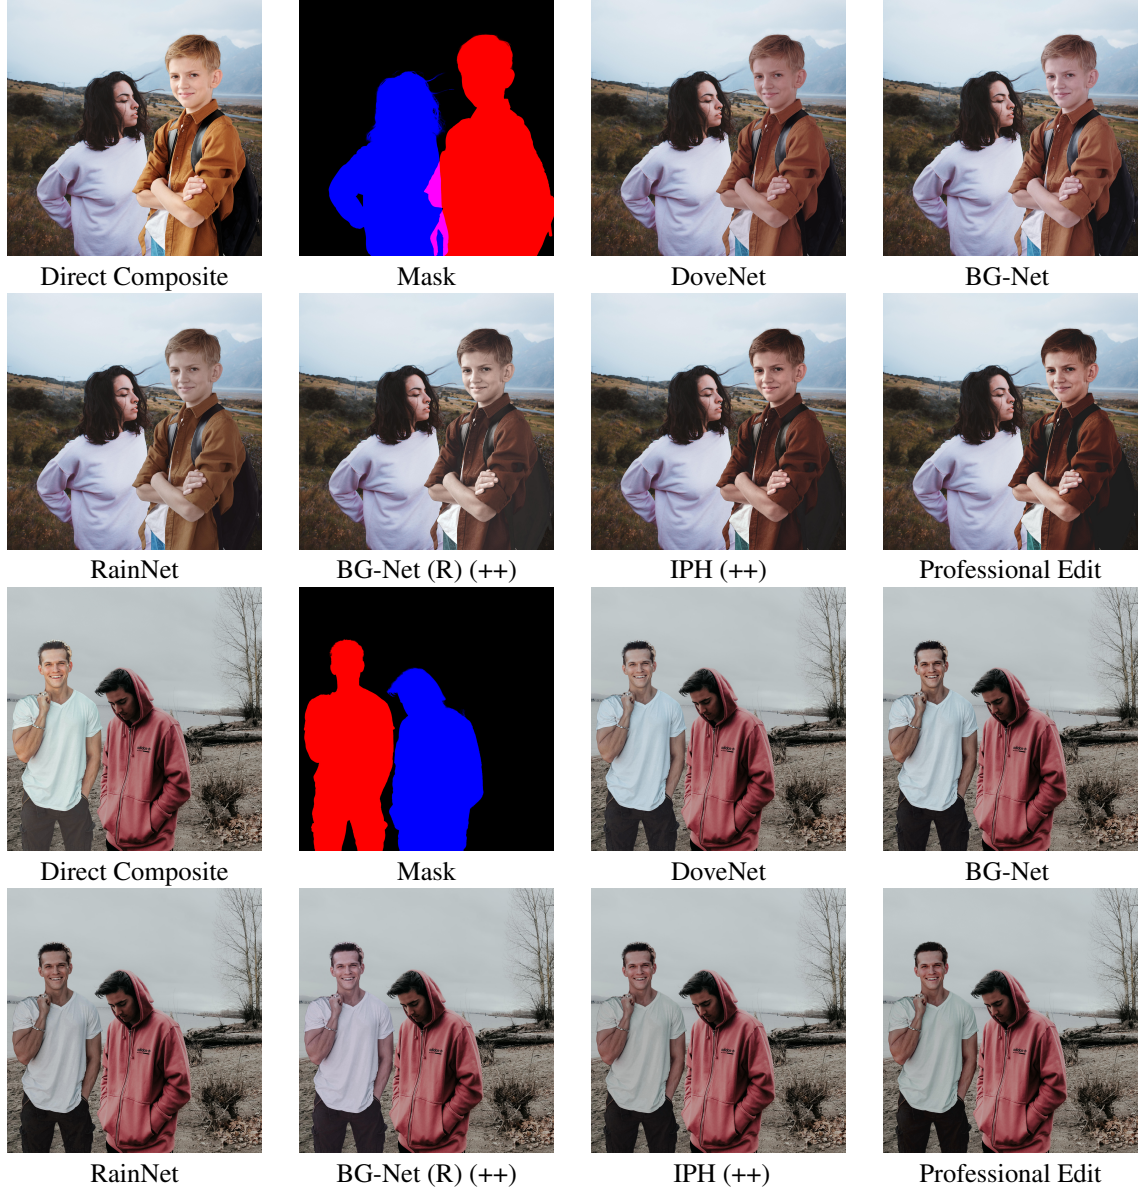

Figure 3: **Comparison with the State-of-the-art methods.** The red region in the mask corresponds to the foreground composite region while the blue region corresponds to the reference region. IPH is our proposed method and the professional edit is the ground truth.
